# Supplementary material for: DCZ19931, a novel multi-targeting kinase inhibitor, inhibits ocular neovascularization
Source: Springer Nature journal article supplement (doi:10.1038/s41598-022-25811-0), 2022-12-13

**MS Title:** *DCZ19931, a novel multi-targeting kinase inhibitor, inhibits ocular neovascularization*

Huiying Zhang<sup>1, ‡</sup>, Bo Li<sup>2,3,4, ‡</sup>, Jingjuan Ding<sup>1, ‡</sup>, Rong Ye<sup>1</sup>, Zhijian Xu<sup>2,3,4</sup>, Qiuyang Zhang<sup>1</sup>, Siguo Feng<sup>1</sup>, Qin Jiang<sup>1,\*</sup>, Weiliang Zhu<sup>2,3,4,\*</sup>, Biao Yan<sup>5,6,7,\*</sup>

<sup>1</sup> The Affiliated Eye Hospital, Nanjing Medical University, Nanjing, China

<sup>2</sup> CAS Key Laboratory of Receptor Research, Shanghai, China

<sup>3</sup> State Key Laboratory of Drug Research, Shanghai, China

<sup>4</sup> Drug Discovery and Design Center, Shanghai Institute of Materia Medica, Shanghai, China

<sup>5</sup> Eye & ENT Hospital, Shanghai Medical College, Fudan University, Shanghai, China

<sup>6</sup> Shanghai Key Laboratory of Visual Impairment and Restoration, Shanghai, China

<sup>7</sup> National Health Commission (NHC) Key Laboratory of Myopia, Fudan University, Shanghai, China

\*Corresponding author at: Eye Institute, Eye & ENT Hospital, Shanghai Medical College, Fudan University, Shanghai, China

\*Corresponding author at: Drug Discovery and Design Center, Shanghai Institute of Materia Medica, Shanghai, China

\*Corresponding author at: The Affiliated Eye Hospital, Nanjing Medical University, Nanjing, China

**E-mail address:**jiangqin710@126.com (Q. Jiang), biao.yan@fdeent.org (B. Yan), wlzhu@simma.ac.cn (WL. Zhu)

<sup>‡</sup> These authors contributed equally to this work.

Supplementary information

Figure 5D

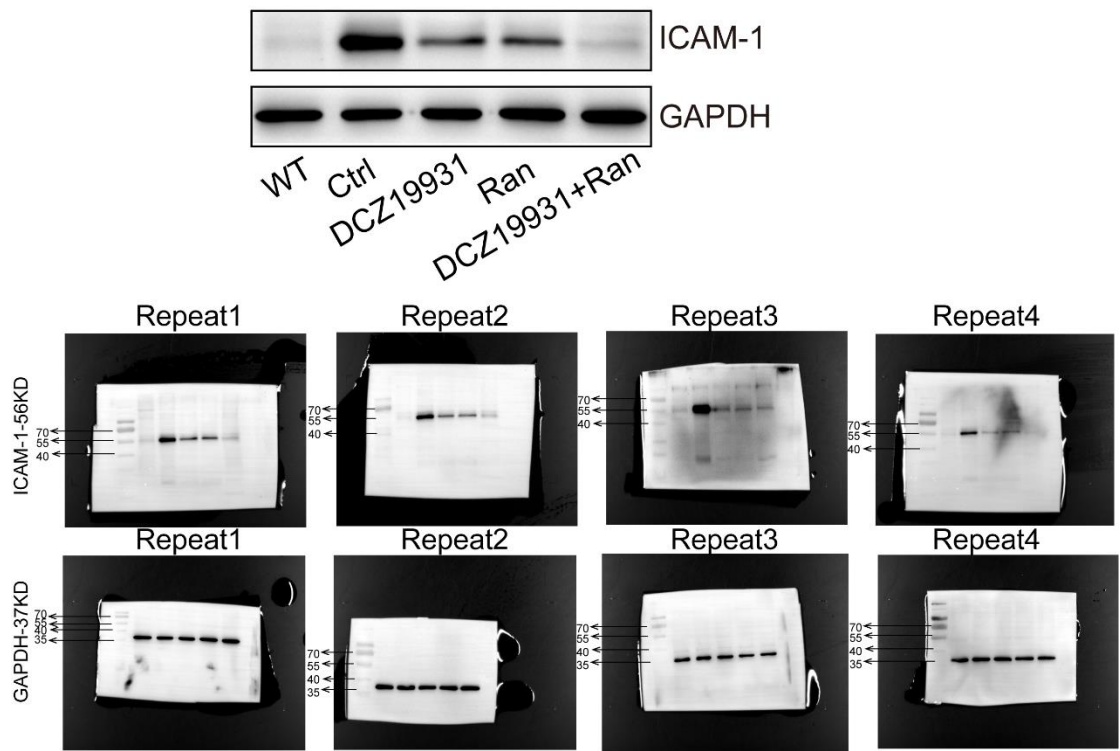

### Figure 6E

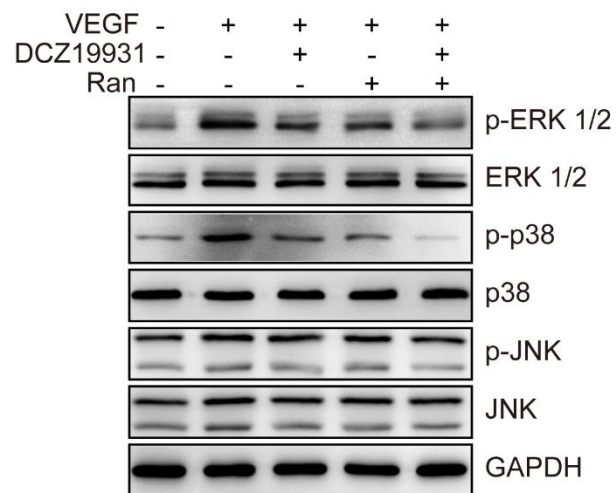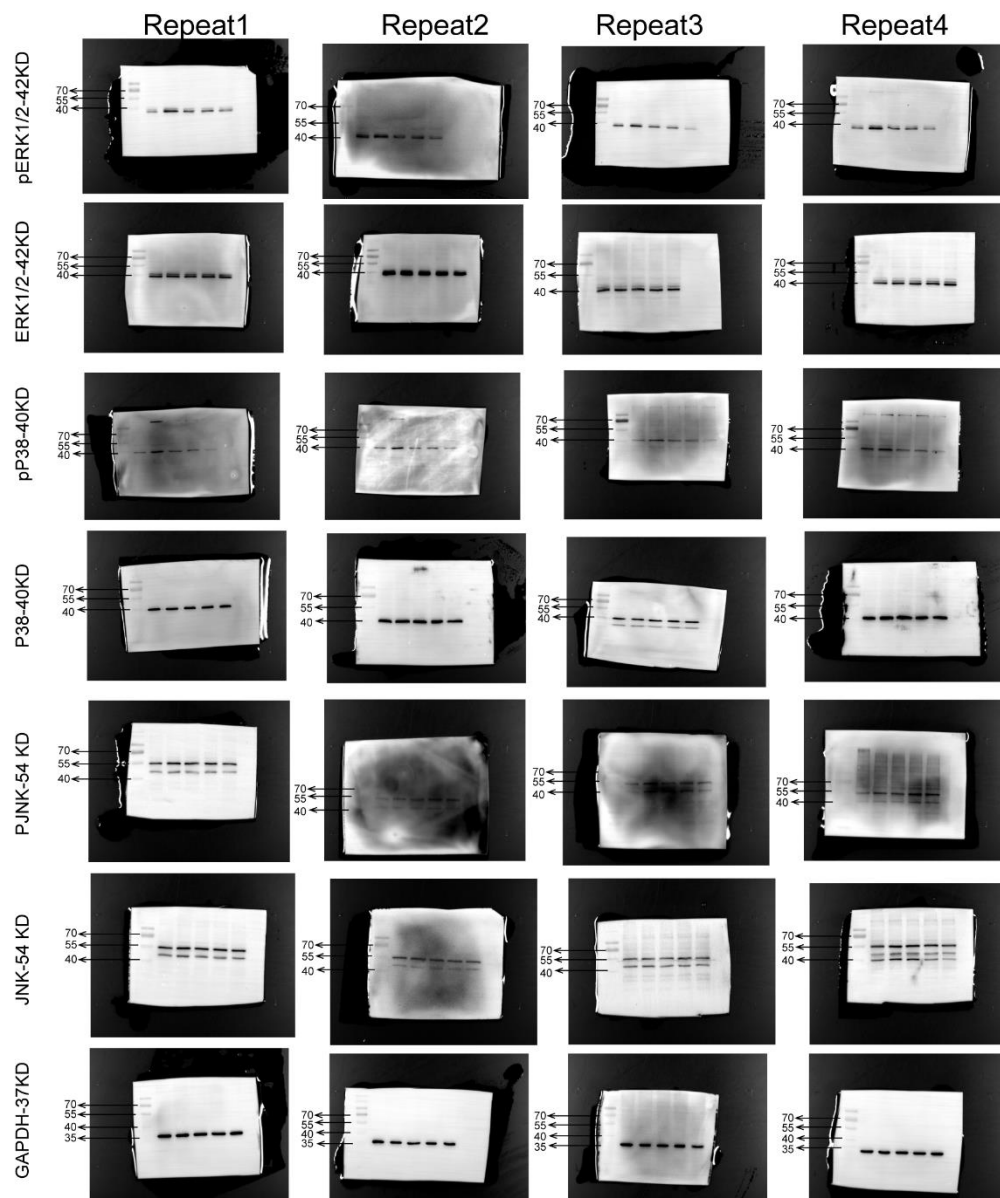

Figure 6F

|          |   |   |   |   |
|----------|---|---|---|---|
| VEGF     | - | + | + | + |
| DCZ19931 | - | - | + | - |
| SB203580 | - | - | - | + |
| U0126    | - | - | - | + |

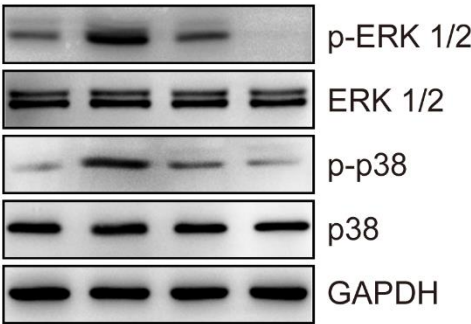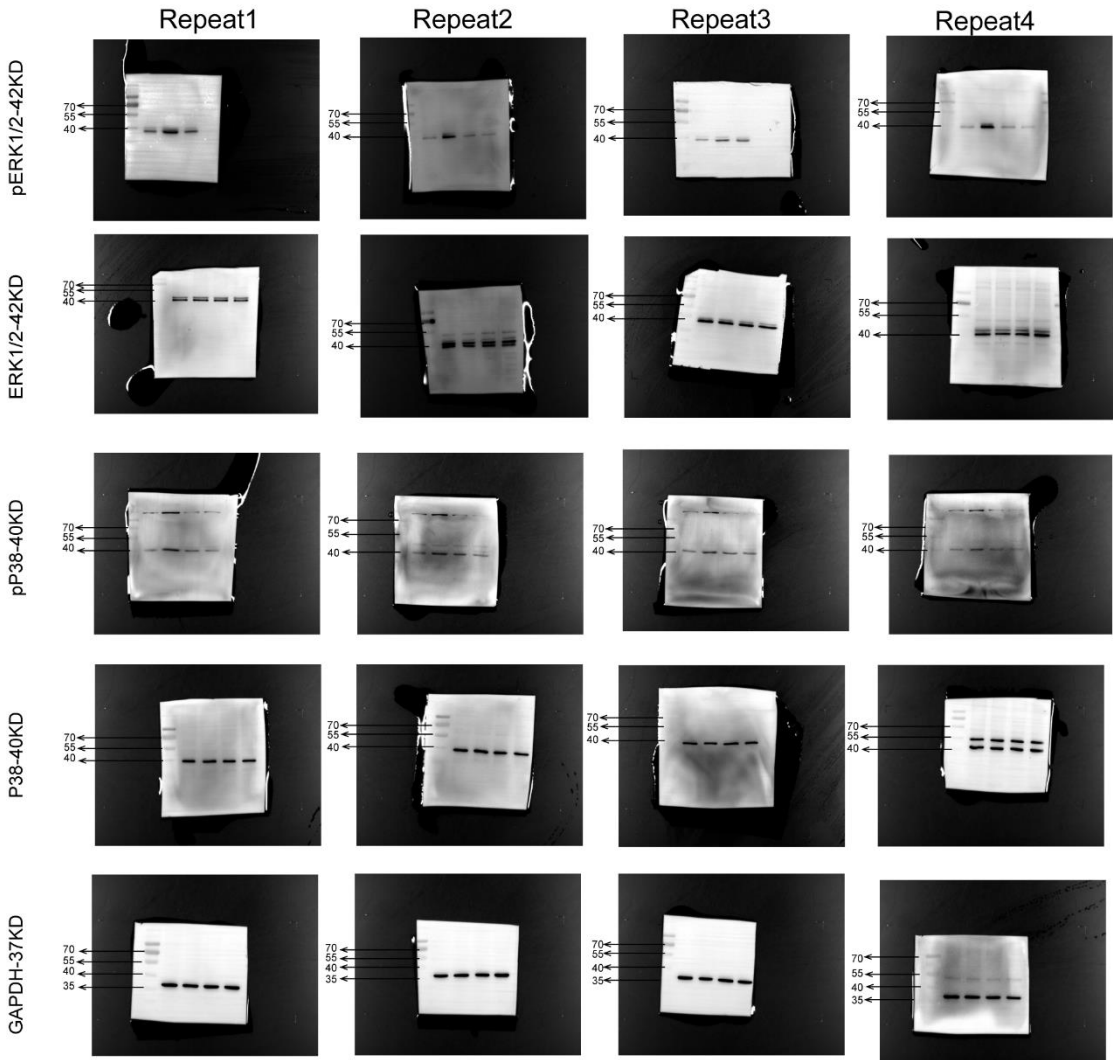

Supplement: MOESM1 [file 41598_2022_25811_MOESM1_ESM.pdf]
